# Supplementary material
Source: Springer Nature journal article supplement (https://www.springermedizin.de/resource/supplementary/13089_2013_70_MOESM4_ESM.pdf/9675650)
Supplement: MOESM4 [file 9675650]

GE  
Lo

- B CHI  
- Frq 10.0 MHz  
- Gn 52  
- E/A 2/1  
- Map 1/0/0  
- D 3.5 cm  
- DR 78  
- FR 22 Hz  
- AO 100 %  
- XBeam On

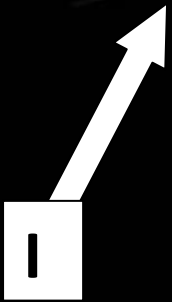

XY

2-

3-

GE  
Lo

- B CHI  
- Frq 10.0 MHz  
- Gn 52  
- E/A 2/1  
- Map 1/0/0  
- D 3.5 cm  
- DR 78  
- FR 22 Hz  
- AO 100 %  
- XBeam On

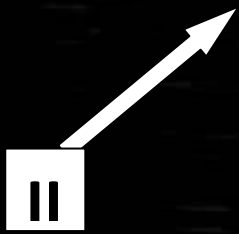

XY

2-

3-
